# Supplementary material for: Reduction of graphene oxide in Li-ion batteries
Source: Royal Society of Chemistry journal article supplement (doi:10.1039/c5ta05068e), 2015-01-01
Supplement: c5ta05068e1.pdf [file c5ta05068e1.pdf]

## Supplementary information for Reduction of graphene oxide in Li-ion batteries

Chunsong Zhao<sup>a</sup>, Hongpeng Gao<sup>a</sup>, Chengmeng Chen<sup>b</sup> and Hui Wu<sup>a\*</sup>

**The preparation of XRD and TEM samples:** We opened the cycled cells and took the GO electrodes out. The RGO electrodes were dipped in the acetonitriles 3 times to wash away the electrolyte. And the RGO was dried in the air at room temperature for 1 hours. Then we characterized this sample with XRD and TEM.

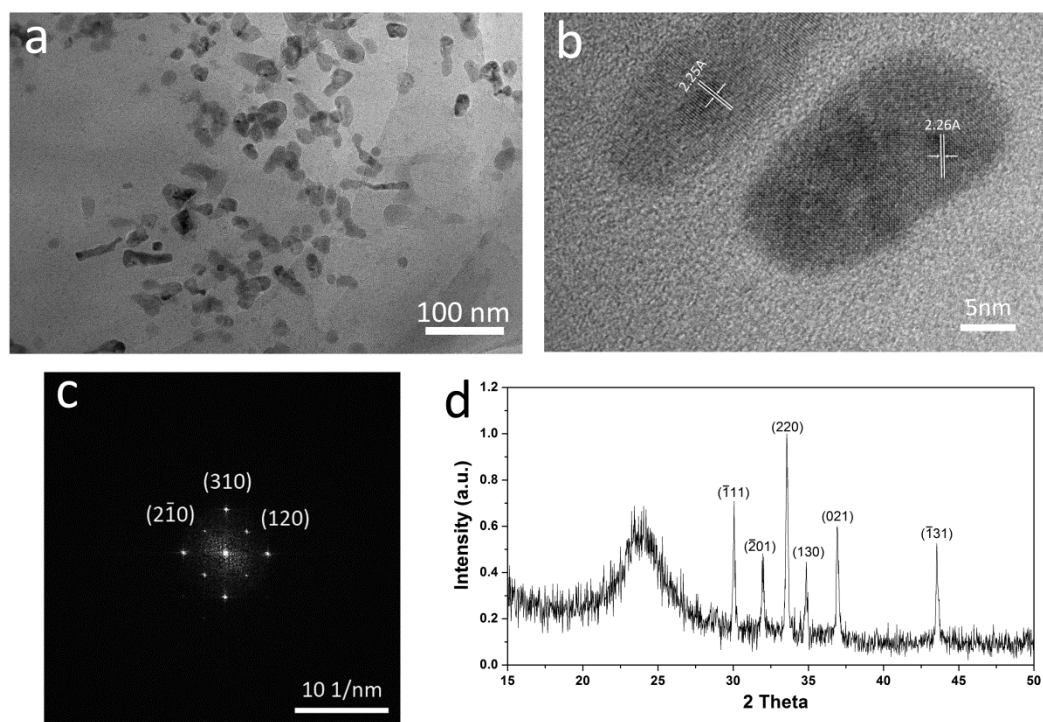

Figure S1 TEM and XRD characterizations of RGO shows there was  $\text{LiOH}\cdot\text{H}_2\text{O}$  on the RGO. (a) TEM image showed many particles on the RGO. (b) The high resolution transmission electron microscope (HR-TEM) image of two particles. (c) The corresponding fast Fourier transform (FFT) image. (d) XRD result showed there was  $\text{LiOH}\cdot\text{H}_2\text{O}$  on the RGO.

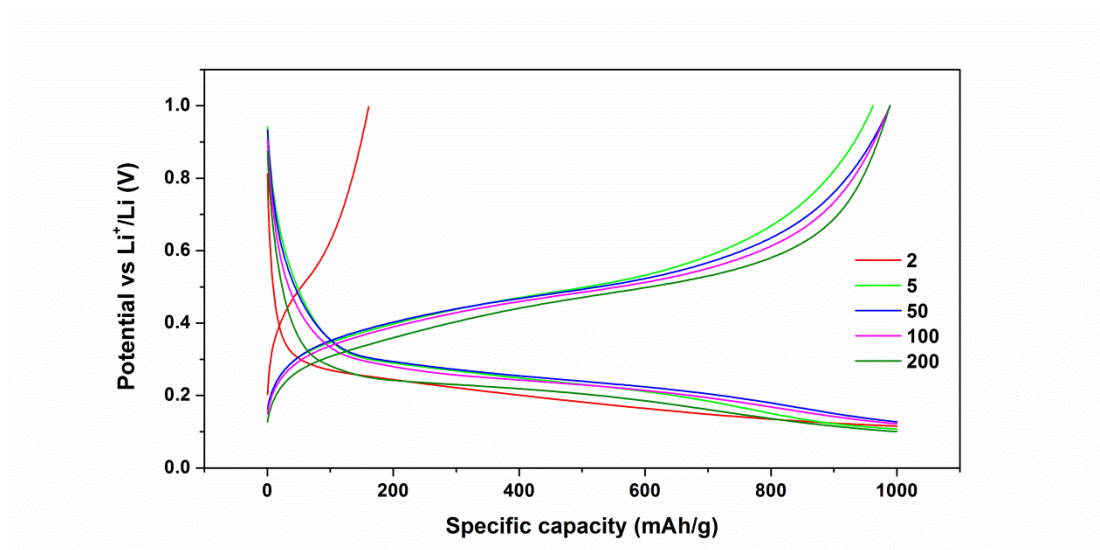

Figure S2 The galvanostatic charge/discharge curves of the GO/Si electrodes in the 2<sup>nd</sup>, 5<sup>th</sup>, 50<sup>th</sup>, 100<sup>th</sup> and 200<sup>th</sup> cycles.
